# Supplementary material for: Low-temperature solution-processed LaNiO3 hole-transport layer for UV-stable inverted perovskite solar cells
Source: Royal Society of Chemistry journal article supplement (doi:10.1039/d3cc01590d), 2023-01-01
Supplement: d3cc01590d1.pdf [file d3cc01590d1.pdf]

## Low-Temperature Solution-Processed LaNiO<sub>3</sub> Hole-Transport Layer for UV-stable Inverted Perovskite Solar Cells

Xi Xia Cui,<sup>a</sup> Junjun Jin,<sup>a</sup> Zhenkun Zhu,<sup>a</sup> Tonghui Guo,<sup>a</sup> Qiang Tang,<sup>b</sup> Yuan Zhou,<sup>a</sup> Lin Li,<sup>a</sup> Zhen Wang,<sup>a</sup> Guanqi Tang,<sup>\*c</sup> and Qidong Tai<sup>\*a</sup>

*a. The Institute of Technological Sciences, Wuhan University Wuhan 430072, P. R. China. E-mail: qdtai@whu.edu.cn*

*b. School of artificial intelligence, Anhui University of Science and Technology, Huainan, Anhui 232000, China*

*c. Research Institute of Frontier Science, Southwest Jiaotong University, Chengdu 610500, P. R. China*

*\*Corresponding author: Qidong Tai and Guanqi Tang, E-mail: qdtai@whu.edu.cn and guanqitang13@swjtu.edu.cn*

### Experimental section

#### *Synthesis of LNO NPs*

The LNO NPs were prepared with a modified low-temperature solution-processed. In a typical procedure, Ni(NO<sub>3</sub>)<sub>2</sub>·6H<sub>2</sub>O (50 mmol), La(NO<sub>3</sub>)<sub>3</sub>·6H<sub>2</sub>O (50 mmol) and citric acid were first dissolved in H<sub>2</sub>O<sub>2</sub> water (30% H<sub>2</sub>O<sub>2</sub>) with ice bath, then a certain amount of ammonia was added as precipitating agent. The precipitates were then centrifuged and rinsed with DI water three times and vacuum-dried overnight at 100 °C. Finally, the dried powder was ground and sintered at 600, 650 and 700 °C for 2 hours to form LNO-1, LNO-2, LNO-3 NPs, respectively. The as-prepared LNO NPs are then dispersed in 2-methoxyethanol at 2 mg/mL and filtered (0.45 μm nylon filter). The LNO film is prepared by spin-coating the colloidal solution on the ITO at 4000 rpm for 30 s and annealed at 150 °C for 30 min. After that, a thin 2PACz film (3 mg/mL in ethanol) was spin-coated on LNO film at 8000 rpm for 30 s and annealed at 150 °C for 30 min.

#### *Solar cell fabrication*

First, perovskite precursor (1.5 M) consisting of PbI<sub>2</sub>, FAI and MAI in a mixture of DMF and DMSO (4:1 v/v) with a perovskite formula as FA<sub>0.4</sub>MA<sub>0.6</sub>PbI<sub>3</sub> was filtered with 0.2 μm nylon filter and coated onto the ITO/LNO substrate by using one-step deposition method with EA anti-solvent with a speed of 5000 rpm for 30 s, followed by annealing at 120 °C for 15 min. After that, a thin PCBM (2 wt% in CB) was spin-coated at 3000 rpm for 30 s on top of the perovskite film and annealed at 100 °C for 10 min.

Finally, The BCP solution (0.5 mg/mL in IPA) was spin-coated at 4000 rpm for 30 s

on top of the PCBM layer, followed by the deposition of a 100 nm Ag electrode by thermal evaporation.

### ***Characterizations***

The X-ray diffraction (XRD) and the transmission electron microscope (TEM) characterizations of the LNO NPs were carried out with Bruker Advanced D8 X-ray diffractometer using Cu K $\alpha$  ( $\lambda=0.154$  nm) radiation and TEM, JEM-2100 (HR), JEOL Co.Ltd, respectively. The scanning electron microscope (SEM) characterization was obtained with FE-SEM, Hitachi SU8010. The UV-Vis spectra of the LNO film were measured with UV-2600 spectrophotometer (Shimadzu, Japan). The x-ray photoelectron spectroscopy (XPS) and ultraviolet photoelectron spectroscopy (UPS) characterizations of the LNO films were obtained with the Thermo Fisher ESCALAB 250XL (USA). The photoluminescence (PL) characterization and time-resolved photoluminescence (TRPL) of the perovskite films were carried out with DW-PLE03 (Fluo Time 300) at a 635 nm excitation wavelength. Photocurrent density–voltage ( $J-V$ ) curves of PSCs were measured with a Keithley 2400 source meter under 1 sun-simulated illumination (AM 1.5 G,  $100 \text{ mW cm}^{-2}$ ) at a scan rate of  $0.05 \text{ V s}^{-1}$ . The external quantum efficiency (EQE) of the PSC was collected with a specialized EQE setup (Newport TLS130B-300X).

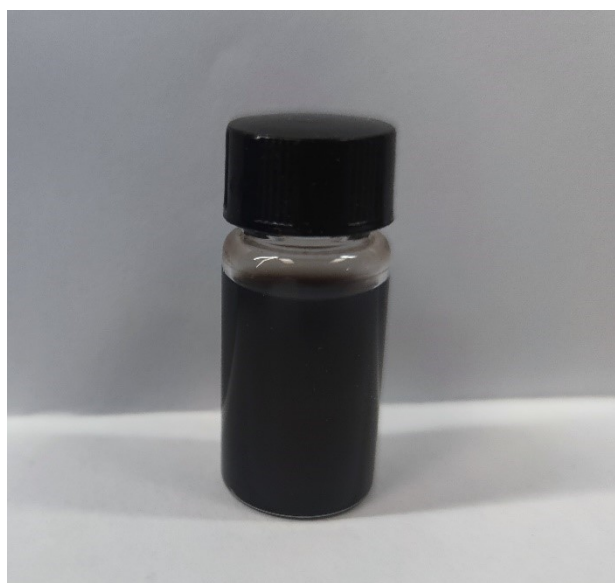

Figure S1. The LNO-2 NPs dispersed in

2ME at a concentration of 2 mg/mL.

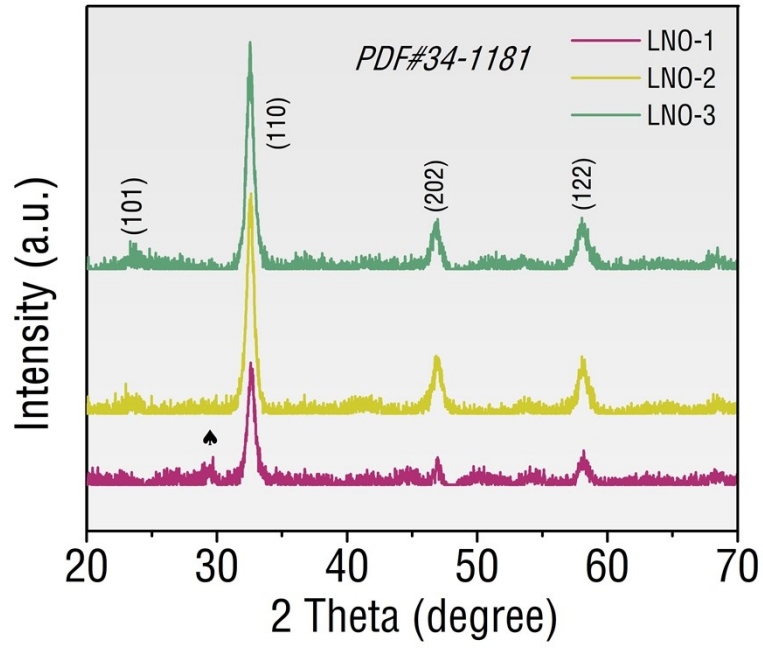

Figure S2. c) XRD spectra of the as prepared LNO-1, LNO-2 and LNO-3 NPs.

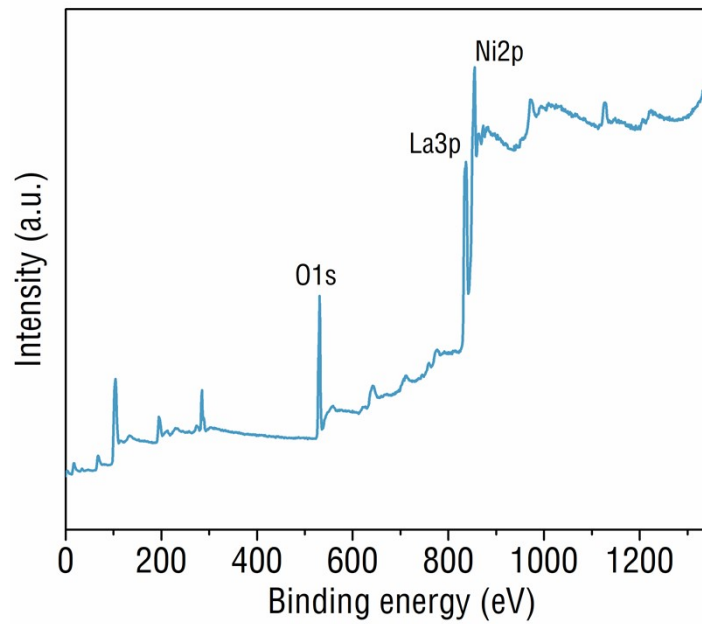

Figure S3. The survey XPS spectra of the LNO-2 NPs.

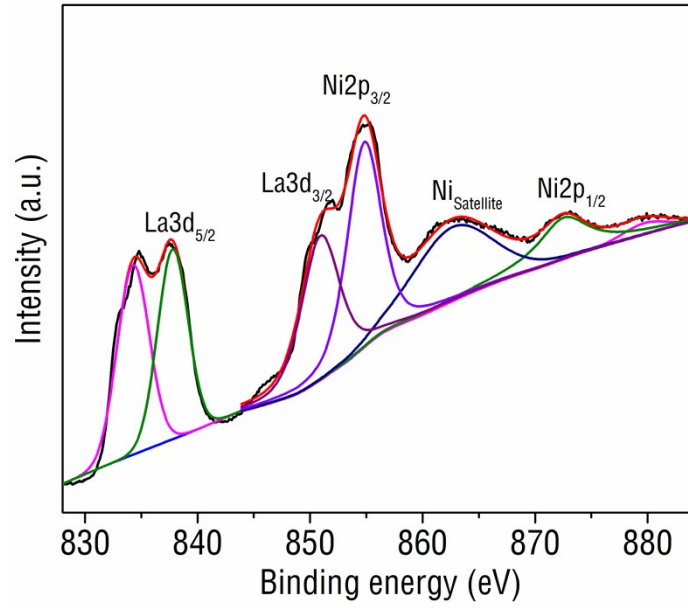

Figure S4. The overlapping La 3d, and Ni 2p XPS spectra of the LNO-2 NPs.

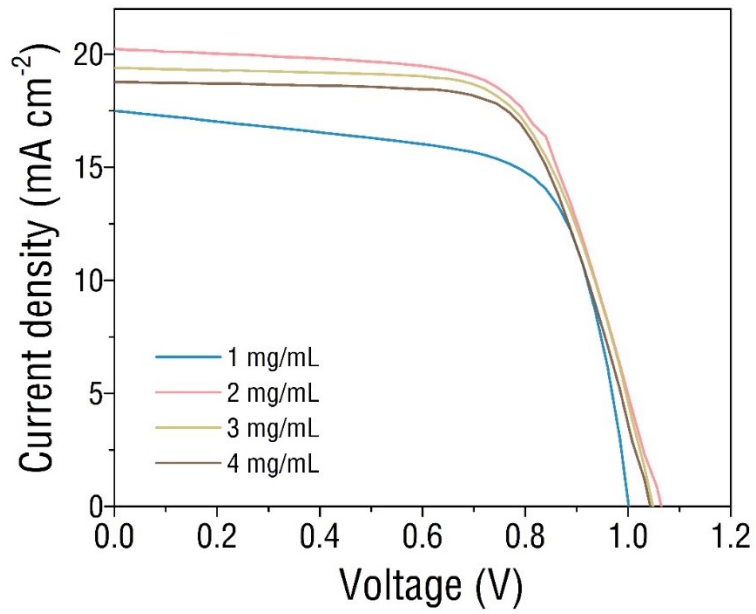

Figure S5. The  $J$ - $V$  curves of devices with LNO HTL with different concentrations of colloidal solution at sintering temperature of 650°C.

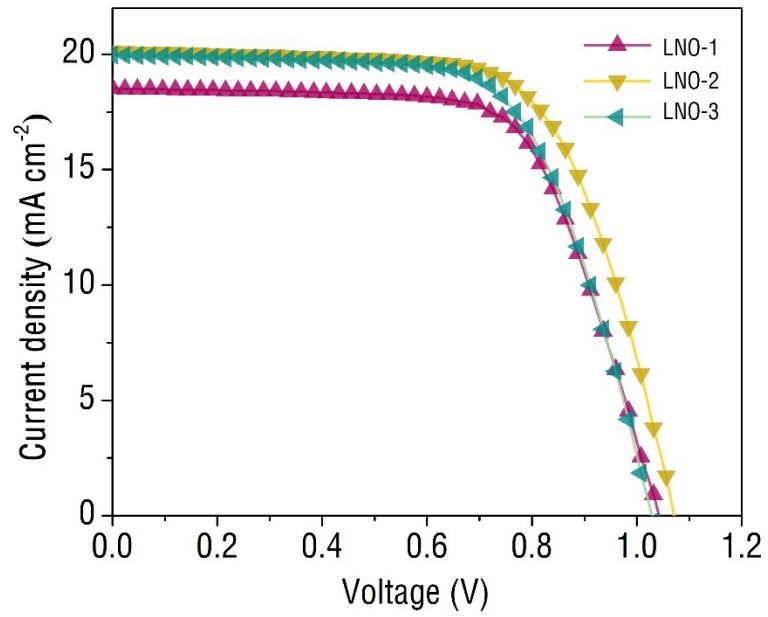

Figure S6. The representative  $J$ - $V$  curves of devices with three LNO HTLs at concentration of 2 mg/mL

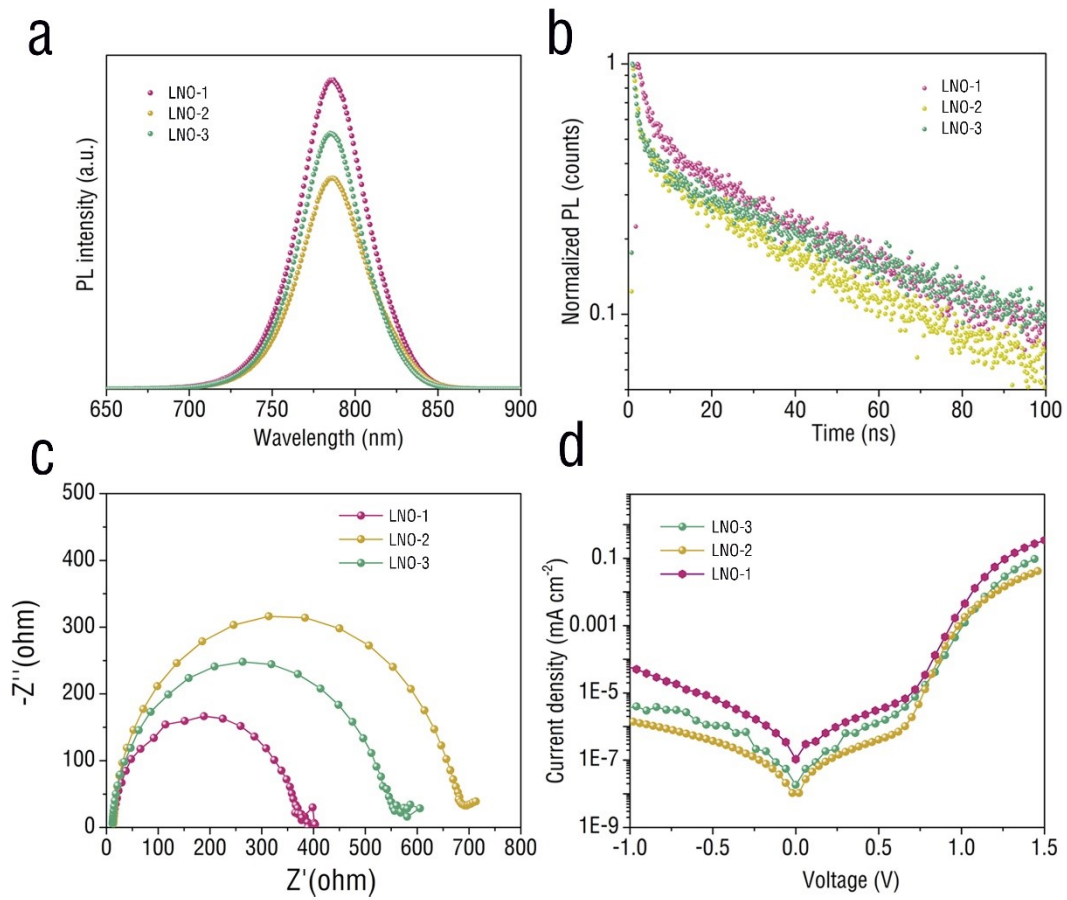

Figure S7. a) Normalized steady PL, b) TRPL, c) Nyquist plots, and d) dark  $J$ - $V$  curves of the corresponding perovskite films on three different LNO HTL.

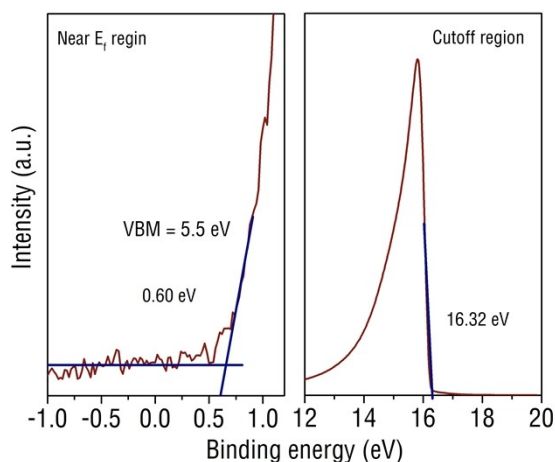

Figure S8. The UPS spectra of 2PACz on LNO HTL.

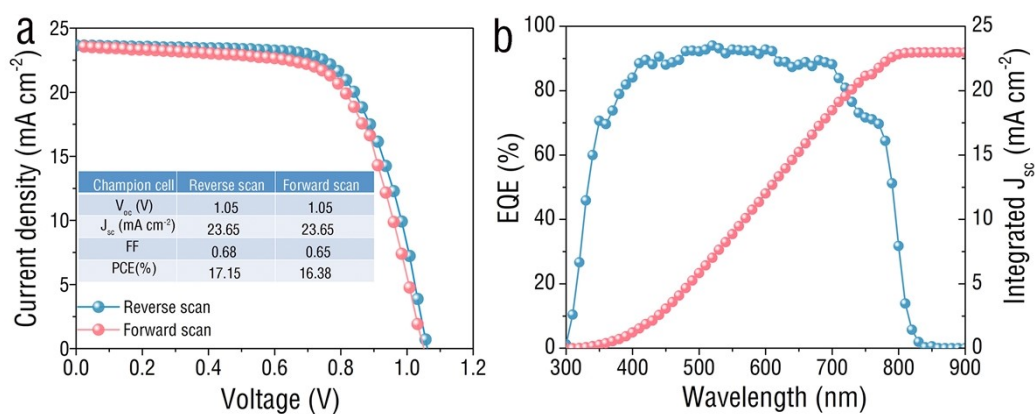

Figure S9.  $J$ - $V$  curves and EQE spectra of the best-performed PSC with LNO-2 HTL with surface passivating of 2PACz.

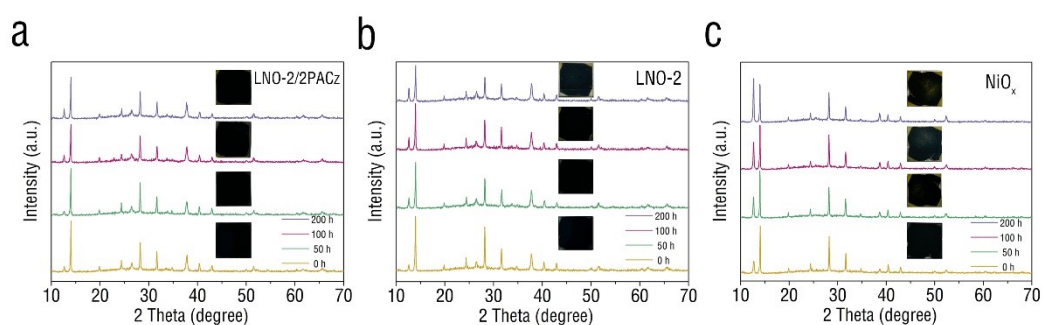

Figure S10. a-c) The evolution of XRD patterns and corresponding photographs of perovskite films deposited on different substrates under continuous UV light irradiance ( $365 \text{ nm}$ ,  $8 \text{ W m}^{-2}$ ) in ambient atmosphere with 43% relative humidity.

Table S1 The device performances of LNO-2 at different concentrations

| Concentrations<br>(mg/mL) | $J_{SC}$ [ $\text{mA cm}^{-2}$ ] | $V_{OC}$ [V] | FF | PCE [%] |
|---------------------------|----------------------------------|--------------|----|---------|
|---------------------------|----------------------------------|--------------|----|---------|

|   |       |      |      |       |
|---|-------|------|------|-------|
| 1 | 17.49 | 1.01 | 0.67 | 11.86 |
| 2 | 20.24 | 1.06 | 0.65 | 13.98 |
| 3 | 19.39 | 1.05 | 0.69 | 13.64 |
| 4 | 18.77 | 1.03 | 0.69 | 13.39 |

Table S2 The device performances of LNO NPs at different sintering temperatures.

| Substrates | $J_{SC}$ [mA cm <sup>-2</sup> ] | $V_{OC}$ [V] | FF   | PCE [%] |
|------------|---------------------------------|--------------|------|---------|
| LNO-1      | 18.55                           | 1.04         | 0.67 | 12.91   |
| LNO-2      | 20.13                           | 1.07         | 0.67 | 14.39   |
| LNO-3      | 19.97                           | 1.03         | 0.66 | 13.52   |

Table S3 PL decay curves of corresponding perovskite films on LNO HTL at different sintering temperatures fitted by a bi-exponential function  $I(t) = A_1 \exp(-t/\tau_1) + A_2 \exp(-t/\tau_2)$ , and  $\tau_{avg} = \tau_1 \times (A_1/A_1+A_2) + \tau_2 \times (A_2/A_1+A_2)$

| Substrates | A1/A1+A2 (%) | $\tau_1$ (ns) | A2/A1+A2 (%) | $\tau_2$ (ns) | $\tau_{avg}$ (ns) |
|------------|--------------|---------------|--------------|---------------|-------------------|
| LNO-1      | 65.75        | 34.25         | 5.00         | 64.60         | 56.90             |
| LNO-2      | 29.72        | 70.27         | 3.49         | 45.95         | 44.63             |
| LNO-3      | 66.17        | 33.83         | 3.68         | 60.56         | 54.54             |
